## Insights into the genetic basis of predator-induced response in *Daphnia* - a comparative transcriptomic approach

Verena Tams\*<sup>1</sup>, Jana Helene Nickel\*<sup>2</sup>, Anne Ehring<sup>2</sup>, Mathilde Cordellier<sup>2</sup>

\* equal contribution

<sup>1</sup> Universität Hamburg, Institute of Marine Ecosystem and Fishery Science, Große Elbstraße 133, 22767 Hamburg, Germany

<sup>2</sup> Universität Hamburg, Institute of Zoology, Martin-Luther-King-Platz 3, 20146 Hamburg, Germany

Corresponding author: [mathilde.cordellier@uni-hamburg.de](mailto:mathilde.cordellier@uni-hamburg.de), phone +49 (0)40-42838-3933

## Abstract

Phenotypic plastic responses allow organisms to rapidly adjust to environmental challenges. Although phenotypic plastic responses to predation risk have been reported for the ecological and genomic model organism *Daphnia*, their genetic basis is not well understood. Here, we characterized the transcriptional profile of *Daphnia galeata* when exposed to fish kairomones. First, we investigated the differential gene expression, identifying candidate transcripts being involved in shifts of life history traits. A total of 125 differentially expressed transcripts (40 up- and 85 downregulated) were identified. Second, we applied a gene co-expression network analysis to find clusters of tightly linked transcripts and reveal the genetic pathways underlying predator-induced responses. Our results showed that transcripts involved in remodeling of the cuticle, growth and digestion correlated with life history shifts in *D. galeata*. Furthermore, we compared our results with previous studies on other *Daphnia* species. This was achieved using an orthology approach on *D. magna* predator-induced response on the one hand, and reproduction associated genes in *D. pulex* on the other hand. The unique combination of methods including the comparative approach allowed for the identification of candidate transcripts, their functions and orthologs associated with predator-induced responses in *Daphnia*.

Keywords: RNA-seq, predator-induced response, gene co-expression, phenotypic plasticity,

*Daphnia galeata*

## Introduction

Organisms are challenged throughout their lives by environmental changes that have an impact on the health and fitness of each individual. Stress, an internal state initiated by an external factor (stressor) is relative and has to be considered with respect to the ecological niche of an individual (Van Straalen, 2003). A given phenotype that is advantageous in one environmental setup might become disadvantageous in another. In general, organisms have two possibilities to cope with environmental changes: return to the ecological niche by behavioral (i.e. migration) or physiological changes, or change the boundaries of their ecological niche by genetic adaptation (Van Straalen, 2003). The former is achieved at the phenotypic level describing phenotypic plastic responses, while the latter is a genetic adaptation process, where genotypes with a higher fitness pass on their alleles to the next generation.

Predation is an important biotic factor structuring whole communities (e.g., Boaden & Kingsford, 2015; Aldana *et al.*, 2016), maintaining species diversity (e.g., Estes *et al.*, 2011; Fine, 2015) and driving natural selection in populations (e.g., Morgans & Ord, 2013; Kuchta & Svensson, 2014). Vertebrate as well as invertebrate aquatic predators release kairomones into the surrounding water (Macháček, 1991; Stibor, 1992; Stibor & Lüning, 1994; Schoeppner & Relyea, 2009). In some instances, kairomones can be detected by their prey, inducing highly variable as well as predator-specific responses to reduce their vulnerability. These predator-induced responses are a textbook example of phenotypic plasticity and have been reported in detail for a

variety of *Daphnia* species (e.g., Weider & Pijanowska, 1993; Boeing, Ramcharan, & Riessen, 2006; Yin *et al.*, 2011; Herzog *et al.*, 2016).

*Daphnia* are small branchiopod crustaceans and are a model organism widely used in ecology, evolution and ecotoxicology. Members of this genus link trophic levels from primary producers to consumers in freshwater ecosystems and are, therefore, vulnerable to high predation risk (Lampert, 2011). Extensive shifts in behavior, morphology and life history traits have been observed in response to predation and predation risk. The responses induced by invertebrate predators include morphological changes such as the formation of helmets in *D. cucullata* (Agrawal, Laforsch, & Tollrian, 1999) and *D. longispina* (Brett, 1992) and the formation of neck teeth in *D. pulex* (e.g., Tollrian 1995). Vertebrate predators cues have been shown to induce behavioral changes linked to diel vertical migration (Cousyn *et al.*, 2001; Effertz & Von Elert, 2017; Hahn *et al.*, 2019) as well as changes in life history traits (Boersma, Spaak, & De Meester, 1998; Effertz & Von Elert, 2017) in *D. magna*. The specificity of such predator-induced responses by vertebrate and invertebrate kairomones has been shown, e.g. for the *D. longispina* species complex from the Swiss lake Greifensee (Wolinska, Löffler, & Spaak, 2007). The documented changes in life history traits included a decrease in size at maturity when exposed to fish kairomones and an increase when exposed to kairomones of the phantom midge larvae, a predatory invertebrate of the genus *Chaoborus*. The species *D. galeata* is somehow peculiar since individuals exposed to fish kairomones do not show a diel vertical migration behavior (Stich & Lampert, 1981; Spaak & Boersma, 2001),

nor do they produce morphological changes like helmets or neck teeth (Tams *et al.*, 2018). Long-term (14 days) exposure to fish kairomones in *D. galeata* revealed substantial life-historical variation within and among populations, as well as trends congruent to previous studies such as a decrease in both age at first reproduction and somatic growth rate in the presence of fish kairomones (Stibor & Lüning, 1994; Boersma *et al.*, 1998; Tams *et al.*, 2018).

Although phenotypic plastic responses to predation risk have been extensively studied in the ecological and genomic model organism *Daphnia*, their genetic basis is not well understood. Linking predator-induced responses to the underlying genome-wide expression patterns has been attempted from different perspectives in *Daphnia*. Orsini *et al.* (2018) investigated the effect of short-term exposure to fish kairomones (several hours) in *D. magna*, revealing no change in gene expression. Yet another study identified over 200 differentially expressed genes in response to invertebrate predation risk in *D. pulex*, of which the most prominent classes of upregulated genes included cuticle genes, zinc-metalloproteinases and vitellogenin genes (Rozenberg *et al.*, 2015). Finally, a study on *D. ambigua* revealed ~50 responsive genes involved in reproduction, digestion and exoskeleton structure (Hales *et al.*, 2017).

Combined approaches are necessary to understand the complexity of stress responses such as those induced by predators which are known to vary across *Daphnia* species. For one, gene expression profiling and gene co-expression analysis are current methods used to describe transcriptomes in different organisms, e.g.

plants (reviewed by Serin *et al.*, 2016), vertebrates (Ghazalpour *et al.*, 2006), invertebrates (Zhao *et al.*, 2016) and humans (reviewed by de la Fuente, 2010). Gene co-expression network analysis is used to infer gene functions through the modular structure of co-expressed genes and their functional relations (Bergmann, Ihmels, & Barkai, 2004). Genes within one co-expression module often share conserved biological functions (Subramanian *et al.*, 2005). Hence, the transcriptional profile gains integrity when the modularity of the co-expressed transcripts is taken into account, revealing potential genetic pathways. The co-expression network of genes is constructed via an adjacency matrix (Langfelder & Horvath, 2008). Modules, cluster of highly interconnected genes, are identified using hierarchical clustering (Langfelder & Horvath, 2008). The benefit of the co-expression network analysis lies in the opportunity to correlate gene expression and phenotype data (Langfelder & Horvath, 2008) simplifying the process of candidate genes identification for further analysis or the design of future experiments. Further, a comparative transcriptomic approach allows revealing common transcripts involved in predator-induced responses across *Daphnia* species. The degree of conservation of the predator-induced response can be estimated by finding orthologous genes in species having diverged million years ago (Cornetti *et al.*, 2019). OrthoMCL is a tool used to identify clusters of orthologous genes (orthologs) that are functionally conserved. The benefit of this tool is that known functions of orthologs in one species can be inferred to assign putative functions to orthologs in another species (Li, Stoeckert, & Roos, 2003).

Our goal is to investigate the genetic basis of life history shifts in response to predator exposure and whether the response is conserved among phylogenetically diverged species that are ecologically highly similar. The ideal candidate species is *Daphnia galeata* to further our knowledge and increase the power of a comparative approach, since this species does not show diel vertical migration behavior (Stich & Lampert, 1981) or severe morphological changes in the presence of vertebrate predator cues, but diverse shifts in life history traits (Tams *et al.*, 2018). To understand the underlying genetic basis of a predator-induced response in the freshwater grazer *D. galeata*, we applied a transcriptomic approach (RNA-sequencing). This was followed by a combined use of differential gene expression analysis and gene co-expression analysis, and an interspecific comparison base on gene orthology. Since most of the predator-induced responses described in earlier studies are related to *Daphnia* reproduction and growth, we expect to identify transcripts relating to reproduction, growth, and/or kairomone perception. We hypothesize that a common predator-induced response exists within the species *D. galeata* as well as among *Daphnia* species at the gene expression level and thus expect orthologous sequences to be involved. To test this hypothesis, we made use of the existing OrthoMCL information from the reference transcriptome of *D. galeata* (Huylmans *et al.*, 2016) as well as results from previous studies on *D. magna* (Orsini *et al.*, 2016) and *D. pulex* (Asselman *et al.*, 2018).

## Materials and methods

### Experimental organisms

This study was conducted on two *D. galeata* clonal lineages originally hatched from resting eggs collected from Müggelsee (northeast Germany) which differ in their life history responses in the presence of fish kairomones (Tams *et al.*, 2018). In a large phenotypic experiment involving 24 clonal lines from four different lakes, Tams *et al.* (2018) revealed that within the Müggelsee population the variation for some life history traits increased when these clonal lines were exposed to fish kairomones, meaning a broader range of phenotypes were displayed for that life history trait. We chose the clonal lines M6 and M9 which differed in all of their life history traits and were at the contrasting ends of the phenotypic range of fish kairomone exposed *D. galeata* (Table S1). The clonal line M6 displayed a phenotype which matured later, produced less offspring and stayed smaller, while the clonal line M9 displayed the opposite phenotype which matured earlier, produced more offspring and became larger (Figure 1).

### Media preparation

ADaM (Klüttgen *et al.*, 1994) was used as the basic medium for fish and *Daphnia* cultures. Two types of media, fish kairomone (FK) and control, were used for breeding and experimental conditions and their preparation is detailed in Tams *et al.* (2018). Briefly, fish kairomone medium was obtained by maintaining five ide (*Leuciscus idus*) in a 20L tank for 24 hours prior to medium use. All media were filtered (Whatman, membrane filters, ME28, Mixed cellulose-ester, 1.2µm) prior to use and nourished with 1.0 mg C L-1, P rich *Acutodesmus obliquus*. Media was exchanged daily (1:2) to ensure a nutrient-

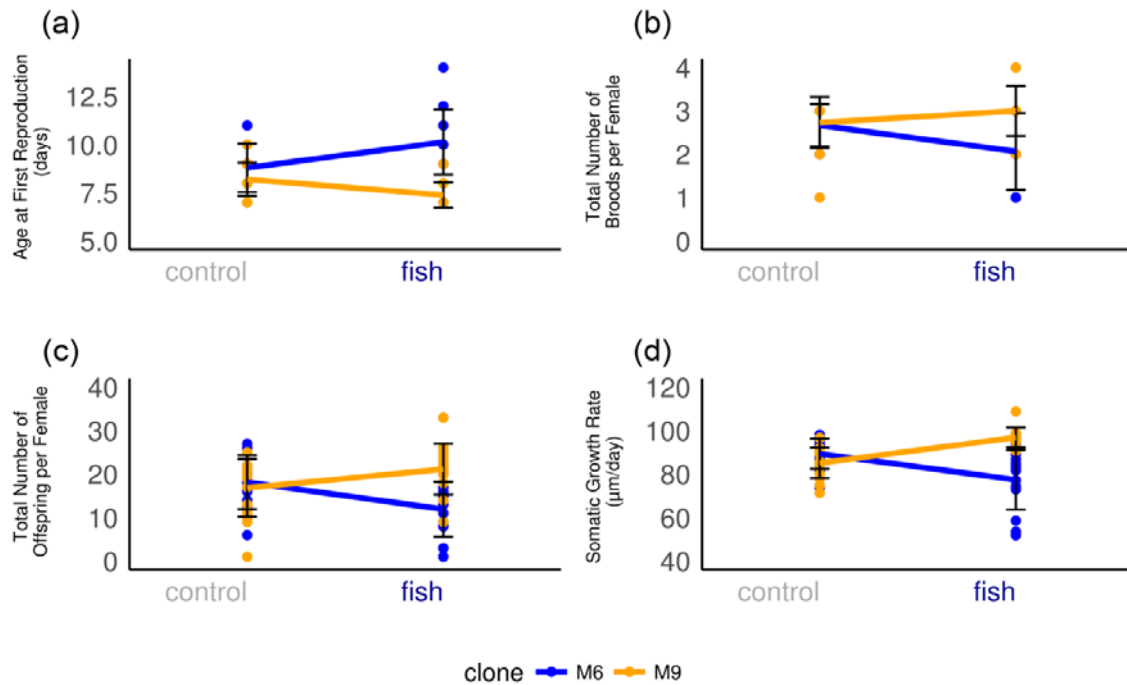

**Figure 1:** Reaction norms of selected life history traits of experimental clonal lines (mean  $\pm$  SE). (a) Age at first reproduction in days. (b) Total number of broods per female (c) total number of offspring per female (d) somatic growth rate in  $\mu\text{m}$  per day. Blue = M6. Orange = M9. Control = environment without fish kairomone exposure. Fish = environment with fish kairomone exposure.

rich environment and a constant fish kairomone concentration. The algae concentration was calculated from the photometric measurement of the absorbance rate at 800 nm. Cetyl alcohol was used to break the surface tension during breeding and the experiment to reduce juvenile mortality (Desmarais, 1997). Breeding and experimental phases were conducted at a temperature of 20°C and a 16h light / 8h dark cycle in a brood chamber with a light intensity of 30% (Rumed, Type 3201D).

#### Experimental design and procedures

Each clonal line was bred in kairomone-free water (control) and in kairomone water (fish) for two subsequent generations before the start of the experiment to minimize inter-individual variances. To this end, 20 egg-bearing females per clonal line were randomly

selected from mass cultures. From these females of unknown age, neonates (<24h) were collected and raised under experimental conditions in 750 mL beakers at densities of <40 neonates per beaker. They served as grandmothers (F0) for the experimental animals (F2). Based upon previous work (Tams *et al.*, 2018), we started the second (F1) generation after 16-20 days to ensure that offspring from the 3rd to 5th brood were used to start the next generation. The third generation of experimental individuals (F2) was started after 18 days. At the start of the experiment, a pair of neonates was introduced in the experimental vessels (50 mL glass tube) to compensate for juvenile mortality. Before the release of the first brood, on day 6, one of the individuals was randomly discarded (if necessary) so that only one individual remained in each vessel. During the 14 days of the

experiment, neonates were removed every 24 hours and the number of broods of each experimental female was documented before media renewal. The adult females were pooled (n=20) and homogenized in RNAmagic (Bio-Budget technologies, Krefeld, Germany). Only experimental females bearing eggs were pooled, resulting in a minor difference in age and experimental time as some experimental females had been pooled a day later. The advantage of sampling females in their inter-molt stage (egg-bearing) is to ensure a stable gene expression (Altshuler *et al.*, 2015). Five biological replicates were used per experimental condition (environment) and per clonal line, resulting in a total of 400 individuals (two clonal lines x two environments x 20 individuals x 5 biological replicates). The experiment lasted for 14 days for each experimental individual to assess the long-term effect of fish kairomones on gene expression level in *D. galeata* and to make correlations with previously collected data sets on life history possible.

#### Data collection and analysis

##### RNA isolation and preparation

Appropriate amounts of RNA were not available from single individuals, and hence we used pools of experimental individuals. Similar pooling approaches have been used in other *Daphnia* differential gene expression studies (Rozenberg *et al.*, 2015; Orsini *et al.*, 2016; Huylmans *et al.*, 2016; Herrmann *et al.*, 2017; Hales *et al.*, 2017; Ravindran, Herrmann, & Cordellier, 2019). Total RNA was extracted from pools of 20 egg-bearing adults after homogenizing with a disposable pestle and a battery-operated homogenizer in RNAmagic for 5 min. Samples were stored at  $-80^{\circ}\text{C}$  until RNA

isolation. Chloroform was added to the homogenate before centrifuging in Phasemaker tubes (Carlsbad, CA, USA) to separate the upper aqueous and lower phenol phase. The upper aqueous phase was transferred into a clean microcentrifuge tube and the RNA precipitated with absolute ethanol. RNA purification and DNase treatment were conducted using a modified protocol of the Direct-zol<sup>TM</sup> RNA MiniPrep Kit (Zymo Research, Irvine, CA, USA). Quality and quantity of purified RNA was checked by spectrophotometry using a NanoDrop 2000 (Thermo Fisher Scientific, Wilmington, DE, USA). The RNA integrity was confirmed with the Agilent TapeStation 4200 (Agilent Technologies, Santa Clara, CA USA). Only samples showing no degradation and RNA Integrity Numbers (RIN)  $> 7$  were used for subsequent steps. Sequencing was performed for 12 samples (two clonal lines x two environments x three biological replicates).

##### RNA-seq library construction and sequencing

Library construction and sequencing was identical for all samples and was performed by the company Macrogen (Seoul, South Korea). mRNA-seq libraries were constructed using Illumina TruSeq library kits. Illumina HiSeq4000 (San Diego, CA, USA) platform was used for paired-end sequencing with 101-bp read length resulting in 48-79 million reads per library.

##### RNA-seq quality control and mapping

The quality of raw reads was checked using FastQC v.0.11.5 (Andrews, 2010). Adapter trimming and quality filtering were performed using Trimmomatic v.0.36 (Bolger, Lohse, & Usadel, 2014) with the following parameters:

ILLUMINACLIP: TruSeq3-PE.fa:2:30:10  
TRAILING: 20 SLIDINGWINDOW: 4:15.  
After trimming, the read quality was checked again with FastQC to control for the successful removal of adapters. The cleaned reads were mapped to the reference transcriptome of *D. galeata* (Huylmans *et al.*, 2016) using NextGenMap v.0.5.4 (Sedlazeck, Rescheneder, & Von Haeseler, 2013) with increased sensitivity (--kmer-skip 0 --s 0.0). All reads which had an identity < 0.8 and mapped with a residue number < 25 were reported as unmapped. The option 'strata' was used to output only the highest mapping scores for any given read and thus the uniquely mapped reads. The quality of filtering and mapping reads was verified with QualiMap v.2.2.1 (Okonechnikov, Conesa, & García-Alcalde, 2016). Subsequently, the htseq-count python script implemented in HTSeq v.0.9.1 was used to quantify the number of reads mapped to each transcript (Anders, Pyl, & Huber, 2015).

#### Differential gene expression analysis

Differential gene expression analysis was performed in the R environment v.3.4.2 (R Core Team, 2017) with the R package 'DESeq2' v.1.18.1 (Love, Huber, & Anders, 2014) implemented in Bioconductor v.3.6 (Gentleman *et al.*, 2004). The calculation was based on normalized read counts per environment (control & fish) using negative binomial generalized linear models. Prior to the analysis, all transcripts with a read count lower than 12 across all libraries were excluded to reduce multiple testing. Results were filtered post-hoc by an adjusted p-value ( $p_{adj} < 0.05$ ) (Benjamini & Hochberg, 1995) to reduce the false discovery rate (FDR) and filtered for a log<sub>2</sub> fold change  $\geq 1$ . Differentially expressed transcripts

(DETs) were binned into four groups: <2-fold, 2- to 4-fold, 4- to 6-fold and >6-fold difference in expression. The three biological replicates were checked for homogeneity by principal component analysis (PCA). A differential expression analysis of genes between environments, between clonal lines and between environments within each clonal line was done. In addition, a two-factor analysis was applied to investigate a genotype-environment interaction (GxE). PCA plots were created in R with 'ggplot2' v.2.2.1 (Wickham, 2009). The web tool jvenn (Bardou *et al.*, 2014) was used to visualize the number of shared genes between groups.

#### Gene co-expression network analysis

Variance-stabilized read counts obtained from the previous 'DESeq2'-analysis were used in the co-expression analysis. First, an automatic, signed weighted, single gene co-expression network construction was performed with the R environment v.3.2.3 with the R package 'WGCNA' v.1.61 (Langfelder & Horvath, 2008). Second, gene co-expression modules were identified using the Topological Overlap Matrices (TOM) with a soft cut-off threshold of 14 in 'WGCNA'. Module eigengenes (ME), representing the average gene expression of their module, were calculated and used to infer correlation with life history traits following the resampling procedure outlined below. Finally, hub-genes, defined as the most interconnected genes per module, were identified.

#### Module eigengene – trait correlation

Modules were related to external trait information that originated from a previous life history study by Tams *et al.* (2018) in which 24 clonal lines were



exposed to fish kairomones. In the gene expression analysis, we had three biological replicates per clonal line, while we had one mean value for every life history trait measured per clonal line. Thus, in order to perform a correlation analysis, we had to assign the same mean trait value to all three biological replicates resulting in potential false or inflated correlations (pseudoreplication). To avoid this artifact, we randomly resampled the available individual trait values for each life history trait in every clonal line, to obtain one “unique” mean trait value per replicate per clonal line (supplementary script: `Resampling_DaphniaFk.Rmd`). For example, we had trait values for 15 individuals for the trait ‘broods’ in the clonal line M6 exposed to fish kairomones (Table S1). In the first resampling step, we randomly picked the life history trait values of 75% of the individuals to calculate a mean. The process was then repeated twice to obtain 3 randomized mean values for this life history trait per clonal line. This step was repeated for every trait value in every clonal line. Finally, the correlation of module eigengenes and the resampled life history trait mean values was calculated. This whole procedure of resampling to calculate randomized means and their correlation to the module eigengenes was repeated 10,000 times to verify the robustness of the ME-trait correlation. We then counted the observations per ME-trait correlation where the correlation value was above a 0.5 absolute value. ME-trait correlations were considered as robust if they occurred in more than 95% of the iterations.

#### Gene set enrichment analysis (GSEA)

To identify the biological importance and the potential function of differentially

expressed and co-expressed transcripts, we assigned Gene Ontology (GO) annotations using the reference transcriptome of *D. galeata* (Huylmans *et al.*, 2016). We performed a gene set enrichment analysis in R with the package ‘*topGO*’ v.2.30.0 (Alexa & Rahnenführer, 2016). The default algorithm ‘weight01’ was used taking the hierarchy of GO terms into account which results in fewer false positive results (Alexa & Rahnenführer, 2016). Given that, a multiple testing correction after the Fisher’s exact test was not applied (Timmermans *et al.*, 2009). GO terms of the three GO categories ‘Molecular Function’ (MF), ‘Biological Process’ (BP) and ‘Cellular Compounds’ (CC) with a p-value < 0.05 were considered significant. Through this procedure, we created two lists of enriched GO terms, “uniqueGO\_FK” and “uniqueGO\_re”.

A list of expected GO terms was created by using the AMIGO database (Carbon *et al.*, 2009). Annotations, associations of genes or gene products, and GO terms were searched for in the database (<http://amigo.geneontology.org/amigo/search/annotation>). We chose to retain results for *Drosophila melanogaster* (‘organism’ filter) only, all other species being phylogenetically too distant. We expected candidate transcripts related to growth, reproduction and kairomone perception. Search terms were thus cell death, cell growth, chitin and molting; hatching, metabolism, reproduction, vitellogenesis, vitellogenin and yolk as well as external stimulus and sensory perception. Since this data mining approach did not focus on the direction of gene expression changes, we excluded GO terms containing positive and negative regulation to narrow down the list of expected GO terms. We excluded sex-specific terms like male, sex

determination, etc. because only parthenogenetically reproducing females were used in this experiment. *Drosophila* specific terms, e.g. oviposition, were deleted from the list. Finally, a list of unique expected GO terms (hereafter, “expected\_GO”) remained with a total of 603 GO terms of which 340 belong to the search class growth, 59 to perception and 204 to reproduction (Table S2).

### Comparative transcriptomics

OrthoMCL cluster information from the reference transcriptome of *D. galeata* was used (Huylmans *et al.*, 2016) to conduct an interspecies comparison of candidate transcripts. These clusters contain orthologs of three *Daphnia* species (*D. galeata*, *D. pulex* and *D. magna*) and two insect species (*Drosophila melanogaster* and *Nasonia vitripennis*). A custom python script was used to parse the orthoMCL output and assign orthologous clusters to the transcripts of interest (supplementary script: OMCLFinal.py).

To reveal common predator-induced transcripts, we identified orthologs from candidate transcript sets related to predation risk for *D. galeata* and *D. magna*. The *D. galeata* transcript sets of interest were derived from the gene co-expression network analysis (experimental design: long-term exposure to fish kairomones) described above. The *D. magna* transcript sets of interest were generated by applying the same analysis workflow as described above for *D. galeata* to the published RNA-seq data by Orsini *et al.* (2016) (experimental design: short-term exposure to fish kairomones). RNA-seq data and reference *D. magna* transcriptome were available from the International Nucleotide Sequence Database Collaboration BioProject PRJNA284518.

To identify common reproduction-related transcripts in *Daphnia* species, we identified orthologous clusters containing both reproduction-related transcripts in *D. galeata* and transcripts predicted to be involved in *D. pulex* reproduction identified by (Asselman *et al.*, 2018). In this study, gene expression profiles were linked to environmental factors such as food quality and anthropogenic stressors in *D. pulex*, and revealed 258 transcripts involved in *Daphnia* reproduction.

Although stressors and exposure durations varied between all three experiments of which the data sets for *D. galeata*, *D. magna* and *D. pulex* originate from, we expected to find shared transcripts involved in predator-induced responses and *Daphnia* reproduction, assuming a conserved predator-induced response at the molecular level.

## **Results**

### RNA-seq data quality

RNA samples passed all quality steps before RNA sequencing. All 12 samples were successfully sequenced, resulting in 48.2 to 79.2 million reads of 101-bp length. After trimming and quality control ~90% of trimmed reads were kept for further analysis. Of these trimmed reads 88-88.74% were uniquely mapped to the *D. galeata* reference transcriptome (Huylmans *et al.*, 2016). After the filtering process, the full data set used for further analysis comprised a total of 32,903 transcripts.

### Differential gene expression analysis

Before subsequent analysis all transcripts with a read count lower than 12 across all libraries were excluded, thus 23,982 transcripts remained for both clonal lines.

Accordingly, 21,740 transcripts remained for clone M6 and 21,813 for clone M9.

A principal component analysis (PCA) was performed to visualize the grouping of

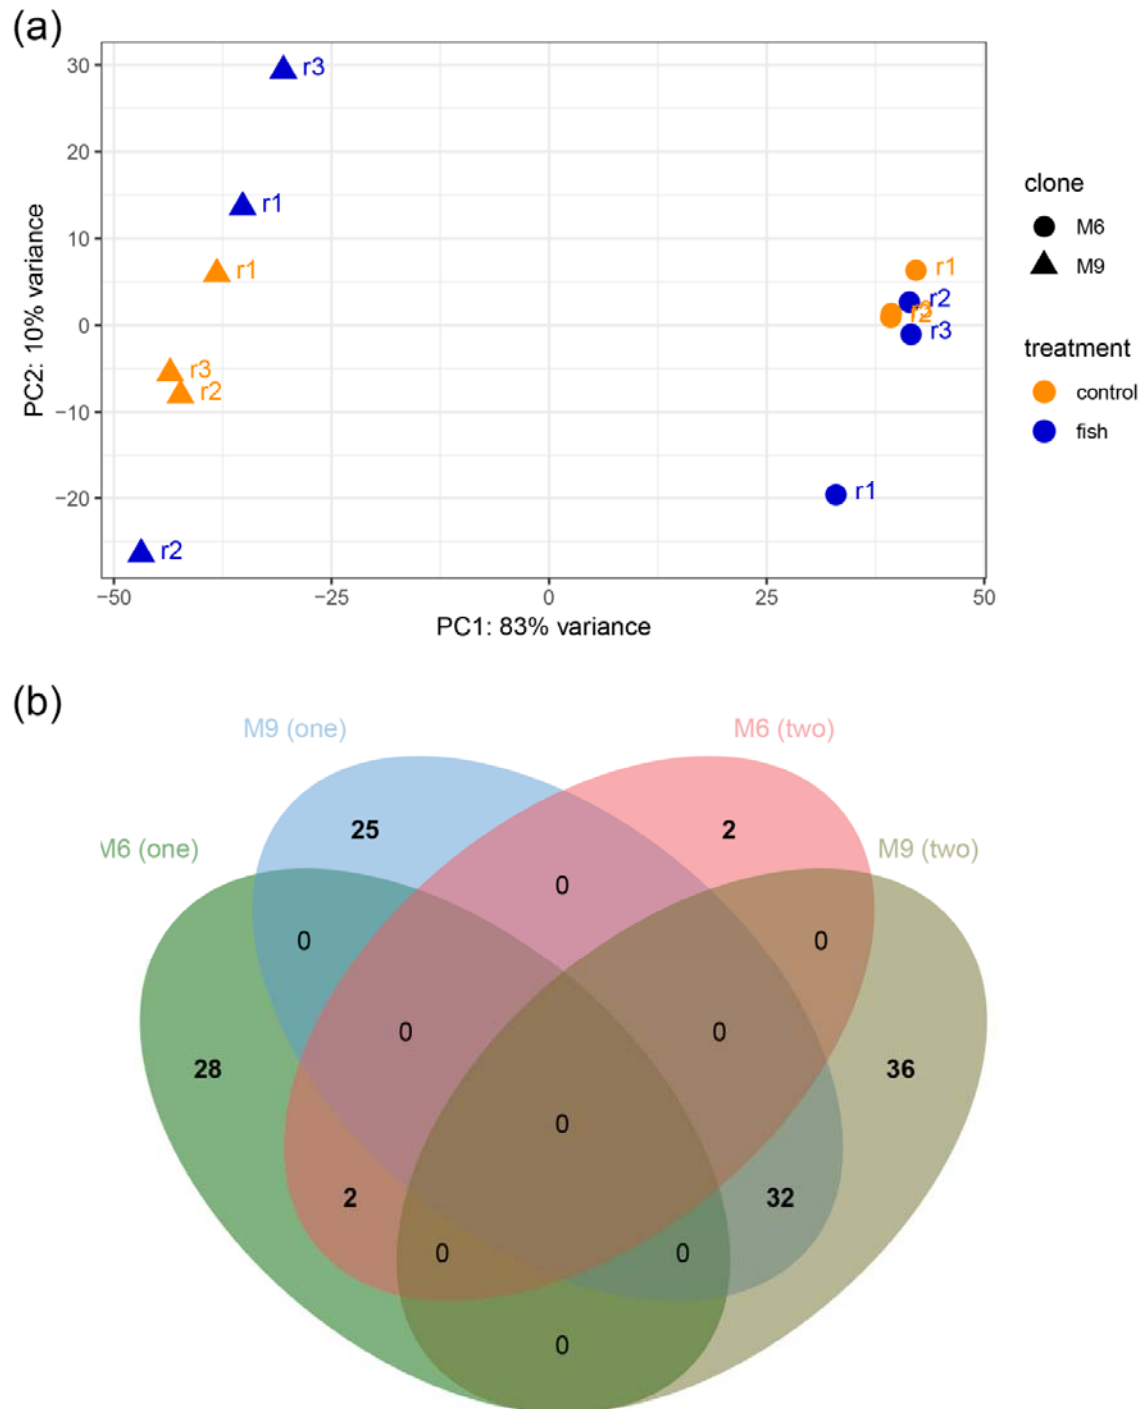

**Figure 2:** (a) Principal component (PC) plot of the biological RNA-seq samples in *D. galeata*. Yellow: control environment. Blue: fish environment. Triangles: clonal line M9. Circles: clonal line M6. (b) Venn diagram of the 125 differentially expressed transcripts (DETs) related to fish kairomone exposure (FK) in *D. galeata*. The set of FK-related DETs originates from the one and two factor analysis. ‘M6 (one)’ = DETs from the one factor analysis for the clonal line M6. ‘M9 (one)’ = DETs from the one factor analysis for the clonal line M9. ‘M6 (two)’ = DETs from the two factor analysis for the clonal line M6. ‘M9 (two)’ = DETs from the two factor analysis for the clonal line M9.

read counts and identify batch effects. The first principal component (PC 1) explained 83% of the variance between clonal lines revealing no clear clustering of read counts per environment (Figure 2A). PC 2 explained just 10% of the variance, which seems to be related to variance between

replicates. To improve the visualization of replicate and environment differences, separate plots per clonal line were produced (Figure S1) resulting in no visible environmental effect.

**Table 1:** Number of differentially expressed transcripts (DETs) in *D. galeata* (p.adj=0.05, foldchange= log2). **(A)** Results of the one-factor analysis. 'Clone' = DETs between clonal lines (M6 over M9). 'M6' = DETs within clonal line M6 between treatments (fish over control). 'M9' = DETs within clonal line M9 between treatments (fish over control). **(B)** Results of the two-factor analysis. 'M6' = treatment effect for clonal line M6 (fish over control). 'M9' = treatment effect for clonal line M9 (fish over control). 'M6 vs M9': differences between the two clonal lines in control environment (M6 over M9). 'M6 vs M9 FK' = differences between clonal lines in fish environment (FK) (M6 over M9). 'GxE' = genotype-environment interaction (clonal line – fish environment).

| <b>A</b> |      | All  | <2-fold | 2- to 4-fold | 4- to 6-fold | > 6-fold |
|----------|------|------|---------|--------------|--------------|----------|
| Clone    |      | 5283 | 1964    | 1486         | 927          | 906      |
|          | up   | 2228 | 743     | 630          | 410          | 445      |
|          | down | 3055 | 1221    | 856          | 517          | 461      |
| M6       |      | 30   | 11      | 11           | 6            | 2        |
|          | up   | 3    | 3       | 0            | 0            | 0        |
|          | down | 27   | 8       | 11           | 6            | 2        |
| M9       |      | 57   | 24      | 27           | 5            | 1        |
|          | up   | 21   | 16      | 5            | 0            | 0        |
|          | down | 36   | 8       | 22           | 5            | 1        |

  

| <b>B</b>    |      | All  | <2-fold | 2- to 4-fold | 4- to 6-fold | > 6-fold |
|-------------|------|------|---------|--------------|--------------|----------|
| M6          |      | 4    | 1       | 2            | 0            | 1        |
|             | up   | 1    | 0       | 0            | 0            | 1        |
|             | down | 3    | 1       | 2            | 0            | 0        |
| M9          |      | 68   | 45      | 16           | 6            | 6        |
|             | up   | 29   | 22      | 5            | 1            | 1        |
|             | down | 39   | 23      | 11           | 5            | 0        |
| M6 vs M9    |      | 4687 | 1624    | 1204         | 899          | 960      |
|             | up   | 1990 | 633     | 494          | 405          | 458      |
|             | down | 2697 | 991     | 710          | 494          | 502      |
| M6 vs M9 FK |      | 3820 | 1114    | 915          | 826          | 965      |
|             | up   | 2016 | 611     | 478          | 428          | 499      |
|             | down | 1804 | 503     | 437          | 398          | 466      |
| GxE         |      | 22   | 11      | 6            | 4            | 1        |
|             | up   | 7    | 3       | 4            | 0            | 0        |
|             | down | 15   | 8       | 2            | 4            | 1        |

The differential expression analysis revealed that there were no differentially expressed transcripts (DETs) between environmental groups, but a total of 5,283 DETs between clonal lines (2,228 up-regulated (42%), 3,055 down-regulated (58%) when setting clone M6 as the control). Because of the strong clone effect, the clonal lines were analyzed separately in a one-factor analysis (Table 1A). Within clonal line M6, there were 30 DETs between environments of which 27 were down-regulated (90%) and 3 were up-regulated (10%). For clone M9 57 DETs were found between environments of which 21 were up-regulated (37%) and 36 were down-regulated (63%). The expression fold-change ( $\log_2$ ) of most of the DETs (53-63%) was above 2.

To account for the genotype-environment (GxE) interaction a two-factor analysis was applied (Table 1B). Between environments clone M6 had four DETs (up: 1 (25%); down: 3 (75%)), while clone M9 had 68 DETs (up: 29 (43%); down: 39 (57%)). The GxE resulted in 22 DETs (up: 7 (32%); down: 15 (68%)).

No DETs were shared between the two clonal lines (genotype) in regard to fish kairomone exposure (environment). Only a small number of DETs were shared within one clonal line for the one and two factor analysis (Figure 2B). In total 125 transcripts were found to be differentially expressed between the two environments of which 40 were up- and 85 were downregulated when comparing fish environment (hereafter, 'FK') to control environment (Table S3). The differential expression of most of the FK-related DETs (~50%) was strong (fold change >2) (Table 1). No DETs were found for the reanalyzed *D. magna* data set. Further results for *D.*

*magna* can be found in the supplementary section (Table S4, Figure S2).

### Gene co-expression network analysis

The single network analysis revealed that the expressed transcripts clustered into 16 co-expression modules (CEM) (Figure 3, Table 2). Most transcripts were assigned to the modules 'turquoise', 'blue', 'brown' and 'yellow'. The 'grey' module includes all transcripts which could not be assigned to any module, representing 6% ( $n=1,525$ ) of all transcripts. For each module, the hub-gene, or the most highly interconnected gene within a gene co-expression module, was identified (Table 2).

A total of five modules were robustly correlated to life history traits, fish kairomone exposure or clonal line with a correlation coefficient >0.5 or < -0.5. Three small gene co-expression modules 'salmon' ( $n= 107$ ), 'red' ( $n= 519$ ) and 'tan' ( $n= 116$ ) were associated to fish kairomone exposure. The 'salmon' module correlated positively with fish kairomone exposure while the 'red' and the 'tan' module correlated negatively with fish kairomone exposure.

**Table 2:** Overview of gene co-expression modules in *D. galeata*. The table summarizes module color, total number of transcripts per module, the name of the most inter-connected gene (hub-gene), gene significances (GS) and its p-value for treatment (fish environment) and clonal line as well as differentially expressed transcripts (DETs) and Gene Ontology (GO) IDs and classes. The module 'grey' contains all co-expressed genes which were not assigned to a co-expression module. Gene significances describe the correlation of the gene to an external trait. The higher the absolute GS, the more biologically significant is the gene. Significant p-values ( $p<0.05$ ) are highlighted in bold.

| module        | Total number of transcripts | hub-gene of co-expression module | GS. treatment | p.GS treatment | GS. done | p.Gsclone   | DETs       | GO.ID      | GO.class                          |
|---------------|-----------------------------|----------------------------------|---------------|----------------|----------|-------------|------------|------------|-----------------------------------|
| turquoise     | 5154                        | abyss239                         | 0.44          | 0.15           | -0.51    | 0.09        | no         |            |                                   |
| blue          | 4868                        | soapsoapd37687381411             | -0.02         | 0.95           | 1.0      | <b>0.00</b> | no         |            |                                   |
| brown         | 4760                        | soapsoap384083                   | 0.00          | 0.99           | -1.0     | <b>0.00</b> | no         |            |                                   |
| yellow        | 4612                        | oasesvelvLoc2422d15233t1         | -0.37         | 0.23           | 0.58     | 0.05        | no         | GO:0005515 | protein binding                   |
| green         | 950                         | oasesvelvLoc7683t4               | 0.06          | 0.86           | 0.57     | 0.05        | no         | GO:0042302 | structural constituent of cuticle |
| red           | 519                         | oasesvelvLoc2656t3               | -0.54         | 0.07           | -0.14    | 0.67        | no         | GO:0055114 | Oxidation-reduction process       |
|               |                             |                                  |               |                |          |             | no         | GO:0004497 | monooxygenase activity            |
|               |                             |                                  |               |                |          |             | no         | GO:0005057 | copper ion binding                |
|               |                             |                                  |               |                |          |             | no         | GO:0016715 | oxidoreductase activity,.....     |
| black         | 491                         | oasesvelvLoc12661t5              | -0.43         | 0.17           | -0.12    | 0.64        | no         | GO:0005515 | protein binding                   |
| pink          | 251                         | trinitytrinloc25528c0t5          | 0.19          | 0.55           | 0.24     | 0.46        | no         |            |                                   |
| magenta       | 198                         | trinitytrinloc24643c0t2          | 0.38          | 0.22           | 0.41     | 0.19        | no         |            |                                   |
| purple        | 181                         | oasesvelvLoc698d42270t2          | 0.02          | 0.95           | 0.50     | 0.10        | no         |            |                                   |
| green yellow  | 127                         | oasesvelvLoc21585d2383t2         | 0.04          | 0.89           | 0.61     | <b>0.04</b> | no         | GO:0005509 | calcium ion binding               |
|               |                             |                                  |               |                |          |             | no         | GO:0054623 | phospholipase A2 activity         |
|               |                             |                                  |               |                |          |             | no         | GO:0016042 | lipid catabolic process           |
| tan           | 116                         | trinitytrinloc6156c0t1           | -0.55         | 0.06           | 0.13     | 0.69        | <b>yes</b> |            |                                   |
| salmon        | 107                         | abyssk84_f_262622                | 0.65          | <b>0.02</b>    | 0.03     | 0.93        | <b>yes</b> |            |                                   |
| cyan          | 67                          | trinitytrinloc32639c0t1          | -0.15         | 0.64           | 0.29     | 0.36        | no         |            |                                   |
| midnight blue | 56                          | abyssk80_j_452081                | -0.43         | 0.16           | -0.04    | 0.91        | <b>yes</b> |            |                                   |
| grey          | 1525                        | Genes not assigned to a module   |               |                |          |             | no         |            |                                   |

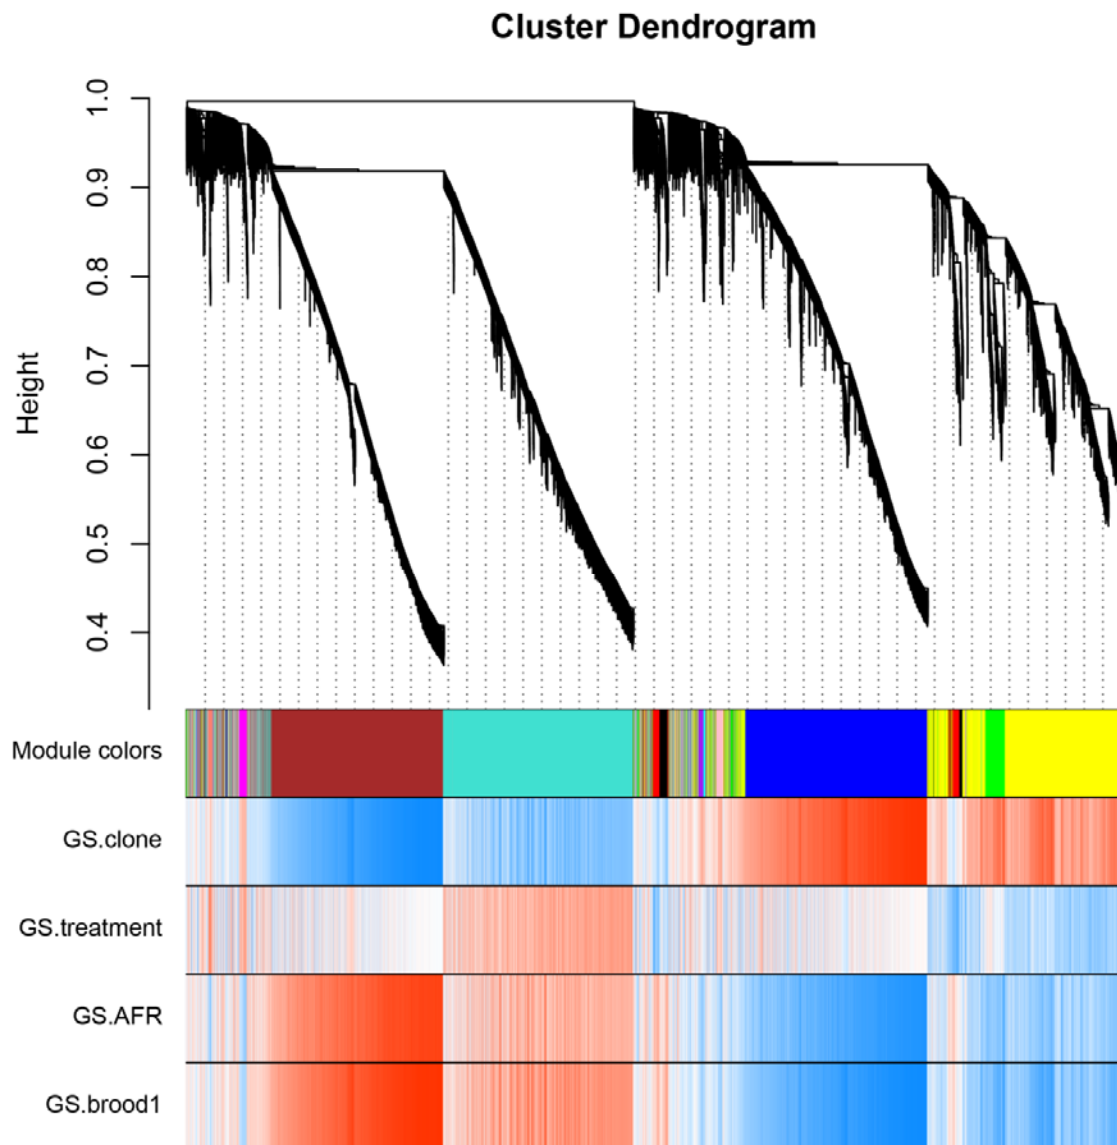

**Figure 3:** Cluster dendrogram of transcripts in *Daphnia galeata*, with dissimilarity based on the topological overlap matrices (TOM). Additional assignments are module colors, the gene significances (GS) for the trait clone (clonal line), treatment (fish kairomone exposure), age at first reproduction ('AFR') and numbers of offspring first brood ('brood1'). Red and blue indicate a positive and negative correlation of the module with the respective trait. Darker hues indicate higher correlation values.

Two large gene co-expression modules, 'brown' (n = 4,760) and 'blue' (n = 4,868), were associated to reproduction-related traits. The 'brown' module was positively correlated with the life history trait total number of offspring of first brood ('brood1') and age at first reproduction ('AFR') as well as negatively correlated

with total number of offspring of third brood ('brood3') and total number of broods ('broods'). In contrast, the 'blue' module showed the exact opposite correlation pattern.

Three hub-genes of co-expression modules belonged to the previously identified FK-related DETs (Table 2),

namely those for the co-expression modules 'midnightblue', 'salmon' and 'tan'. In total 49 of 125 FK-related transcripts identified through the differential gene expression analysis also belonged to a co-expression module of interest ('salmon' n=13 (~12%), 'tan' n=9 (~8%), 'red' n=3 (~0.6%), 'brown' n=17 (~0.3%), 'blue' n=7 (~0.1%)).

A total of 33 co-expression modules were found for the reanalyzed *D. magna* dataset including one module 'royalblue' being positively correlated to fish kairomone exposure. Detailed results can be found in the supplementary section (Table S5, Figure S3).

#### Gene ontology (GO) annotation

The reference transcriptome of *D. galeata* had a total of 10,431 transcripts with

Gene Ontology (GO) annotations (Huylmans *et al.*, 2016). After the initial data filtering of low read counts, 8,173 (~34%) of the transcripts included in the analysis had a GO annotation and thus constituted the gene universe for the gene set enrichment analysis. Transcript sets of interest are either FK- or reproduction-related. FK-related transcripts of interest originated from the co-expression modules 'salmon', 'tan' and 'red' (total n=742), and the differential gene expression analysis (one and two factor analysis; total n=125). Reproduction-related transcripts originated from the co-expression modules 'blue' and 'brown' (total n=9,628). Figure 4 presents an overview of the different transcript sets and the comparisons they were included in.

28 % of transcripts deriving from the co-

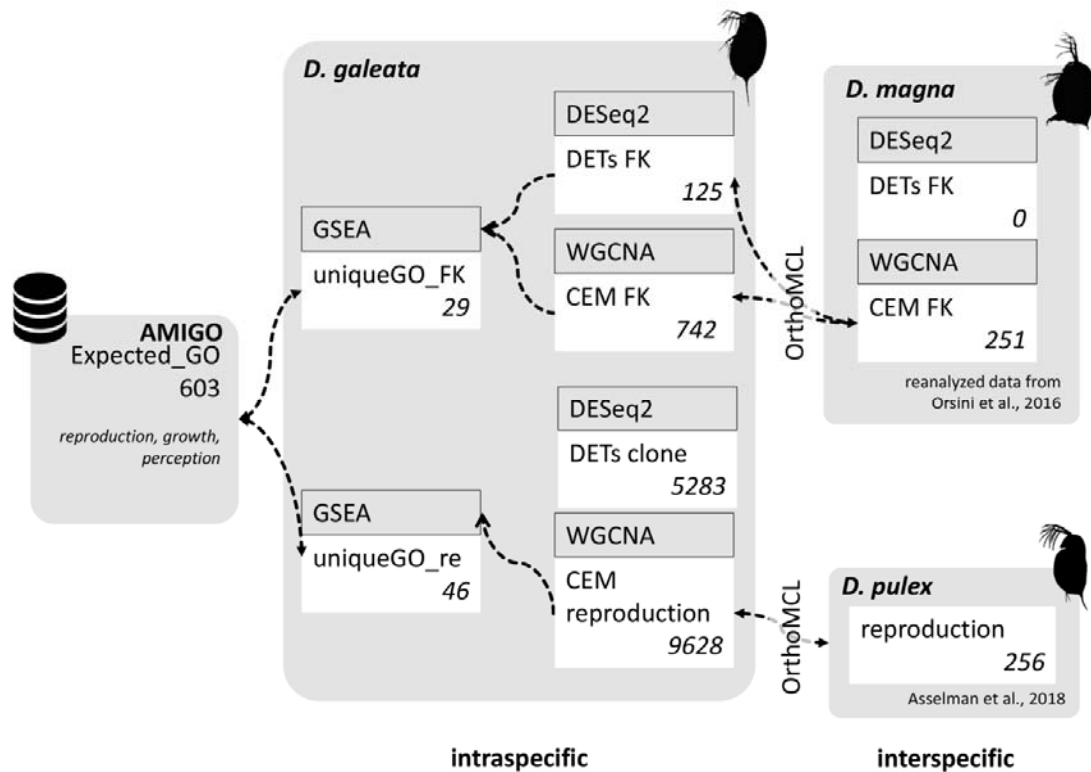

**Figure 4:** Overview of datasets created by gene expression and gene co-expression analysis and used for comparative transcriptomics. 'DESeq2' = gene expression analysis. 'WGCNA' = gene co-expression analysis. 'GSEA' = gene set enrichment analysis. 'OrthoMCL' = identification of orthologous clusters. 'DETs' = differentially expressed transcripts. 'CEM' = co-expression module. 'expected\_GO' = expected GO terms (Table S2). 'uniqueGO\_FK' = significantly enriched GO terms of FK-related transcripts (Table 3A). 'uniqueGO\_re' = significantly enriched GO terms of reproduction-



expression modules of interest were annotated ('blue-brown' n= 2681; 'tan-red-salmon' n= 207). The lowest rate of annotation (23%) was for reproduction-related DETs (n=1,230) and the highest (33%) for the FK-related DETs (n=41).

Five out of the 15 hub-genes had a GO annotation; a total of 9 unique GO terms were assigned to all hub-genes (Table 2). The hub-gene of the 'green' module was involved in 'structural constituent of cuticle' and related to fish kairomone exposure. The hub-genes of the 'black' and the 'yellow' module were involved in 'protein binding' and were related to reproduction. The hub-gene of the 'red' module had several GO terms of which one, the 'oxidation-reduction process' related to reproduction. The hub-gene of the 'greenyellow' module had a fish kairomone exposure related annotation, 'calcium ion binding'.

#### Gene set enrichment analysis (GSEA)

We expected to find GO terms related to reproduction, growth and kairomone perception to be overrepresented in the gene set enrichment analysis. Hence lists derived from GSEA were compared to the list of "expected\_GO" terms.

In total, 29 unique GO terms were significantly enriched in the transcript set derived from the comparison of control and fish kairomones environments (hereafter, "uniqueGO\_FK", Table 3A). In the reproduction related transcript set 46 unique GO terms were significantly enriched (hereafter, "uniqueGO\_re", Table 3B). There was a limited overlap between "expected\_GO" terms, "uniqueGO\_FK" as well as "uniqueGO\_re" (Figure 5A): three common GO terms between expected\_GO and uniqueGO\_FK: ('intracellular', 'growth factor activity' and

'calcium ion binding'), and two common GO terms between "expected\_GO" and "uniqueGO\_re" ('integral component of membrane' and 'carbohydrate metabolic process'). Five unique enriched GO terms were common to fish kairomone exposure and reproduction: 'serine-type endopeptidase activity', 'extracellular matrix structural constituent', 'proteolysis', 'oxidation-reduction process' and 'collagen trimer'.

#### Comparative transcriptomics

##### Interspecies comparison of response to predation risk

The results of our long-term exposure of *D. galeata* to fish kairomones and the results of the short-term exposure of *D. magna* to fish kairomones (Orsini *et al.*, 2018) were compared. Since both the 'salmon' *D. galeata* module and the 'royalblue' *D. magna* module correlated positively to fish kairomone exposure and had a similar size, we hypothesized that they had similar functions in both species and hence expected orthologous sequences in the two sets of transcripts. Although 9,461 orthoMCL clusters comprised at least one transcript for each of the three *Daphnia* species (Huylmans *et al.*, 2016), no orthologous clusters common to the 'salmon' *D. galeata* module and the 'royalblue' *D. magna* module were found.

In addition, we checked whether the 'tan-red' transcripts of *D. galeata* and the 'royalblue' transcripts of *D. magna*, which had a contrasting correlation to fish kairomone exposure, contained orthologous sequences. Here, we could indeed identify 34 orthologous clusters, containing a total of 219 sequences, which related to fish kairomone exposure and thus predator-induced responses in both

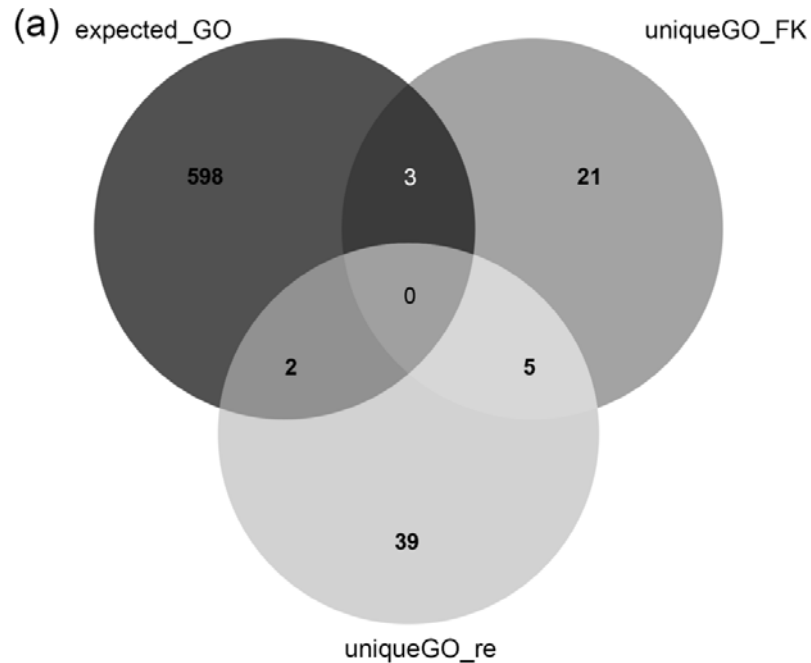

**Figure 5:** (a) Venn diagram of Gene Ontology (GO) classes of *D. galeata* datasets. 'expected\_GO' = classes derived from AMIGO database (Table S2). 'uniqueGO\_FK' = significantly enriched GO classes related to fish environment (Table 3A). 'uniqueGO\_re' = significantly enriched GO classes related to reproduction (Table 3B). (b) Venn diagram of orthologous clusters comprising reproduction-related transcripts. 'Dpul' = orthologous clusters for *D. pulex* (Asselman *et al.*, 2018). 'Dgal\_blue' & 'Dgal\_brown' = orthologous clusters for *D. galeata* transcripts from the co-expression modules 'blue' and 'brown', respectively.

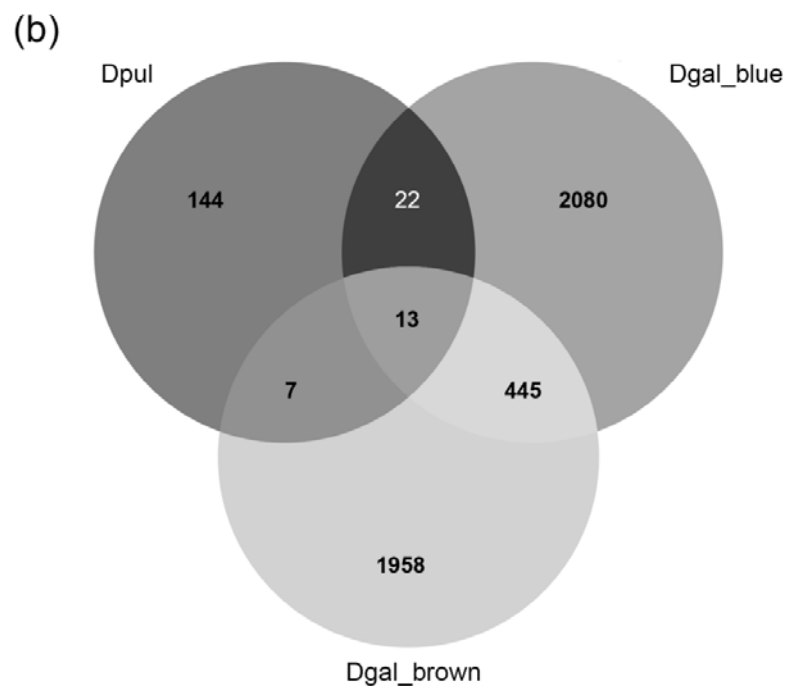

*Daphnia* species. Two-thirds of the identified orthologous clusters were *Daphnia* specific, while the remainder comprised sequences from the other two arthropod species as well (*Nasonia* and *Drosophila*, Table S6A). The genes involved in response to fish predation, which is a stressor specific to smaller

aquatic arthropods (as opposed to terrestrial arthropods) might thus have evolved or arisen in the common ancestor of *Daphnia* after it diverged from the insect lineages.

**Table 3:** List of unique Gene Ontology (GO) terms in gene expression datasets of *D. galeata*. Only significantly enriched GO terms are shown (classicFisher <0.05). **(A)** GO terms related to fish environment, including 29 unique GO terms (“uniqueGO\_FK”). **(B)** GO terms related to reproduction, including 47 unique GO terms (“uniqueGO\_re”).

| <b>A</b> | <b>GO.ID</b> | <b>Term</b>                                 | <b>Annotated</b> | <b>Significant</b> | <b>Expected</b> | <b>classicFisher</b> | <b>geneset</b> | <b>category</b> |
|----------|--------------|---------------------------------------------|------------------|--------------------|-----------------|----------------------|----------------|-----------------|
|          | GO:0004252   | serine-type endopeptidase activity          | 518              | 9                  | 1.78            | 4.30E-05             | salmon         | MF              |
|          | GO:0008762   | UDP-N-acetylmuramate dehydrogenase activ... | 5                | 1                  | 0.02            | 0.017                | salmon         | MF              |
|          | GO:0016887   | ATPase activity                             | 129              | 3                  | 0.44            | 0.03                 | salmon         | MF              |
|          | GO:0016788   | hydrolase activity, acting on ester bond... | 219              | 3                  | 0.75            | 0.039                | salmon         | MF              |
|          | GO:0050660   | flavin adenine dinucleotide binding         | 58               | 4                  | 0.78            | 0.0076               | red            | MF              |
|          | GO:0080019   | fatty-acyl-CoA reductase (alcohol-formin... | 13               | 2                  | 0.17            | 0.0127               | red            | MF              |
|          | GO:0016614   | oxidoreductase activity, acting on CH-OH... | 68               | 4                  | 0.91            | 0.0131               | red            | MF              |
|          | GO:0008083   | growth factor activity                      | 17               | 2                  | 0.23            | 0.0214               | red            | MF              |
|          | GO:0003824   | catalytic activity                          | 4470             | 71                 | 60.11           | 0.025                | red            | MF              |
|          | GO:0016972   | thiol oxidase activity                      | 2                | 1                  | 0.03            | 0.0267               | red            | MF              |
|          | GO:0003951   | NAD+ kinase activity                        | 2                | 1                  | 0.03            | 0.0267               | red            | MF              |
|          | GO:0005509   | calcium ion binding                         | 127              | 5                  | 1.71            | 0.0281               | red            | MF              |
|          | GO:0004930   | G-protein coupled receptor activity         | 215              | 3                  | 0.51            | 0.014                | tan            | MF              |
|          | GO:0005201   | extracellular matrix structural constitu... | 100              | 2                  | 0.24            | 0.023                | tan            | MF              |
|          | GO:0008234   | cysteine-type peptidase activity            | 147              | 2                  | 0.35            | 0.047                | tan            | MF              |
|          | GO:0042302   | structural constituent of cuticle           | 209              | 4                  | 0.16            | 8.20E-06             | M6             | MF              |
|          | GO:0004181   | metallocarboxypeptidase activity            | 47               | 1                  | 0.04            | 0.035                | M6             | MF              |
|          | GO:0004252   | serine-type endopeptidase activity          | 518              | 7                  | 1.67            | 0.0011               | M9             | MF              |
|          | GO:0006508   | proteolysis                                 | 929              | 9                  | 3.76            | 0.008                | salmon         | BP              |
|          | GO:0007156   | homophilic cell adhesion via plasma memb... | 22               | 3                  | 0.3             | 0.0031               | red            | BP              |
|          | GO:0006850   | mitochondrial pyruvate transmembrane tra... | 2                | 1                  | 0.03            | 0.027                | red            | BP              |
|          | GO:0006741   | NADP biosynthetic process                   | 2                | 1                  | 0.03            | 0.027                | red            | BP              |
|          | GO:0055114   | oxidation-reduction process                 | 427              | 11                 | 5.81            | 0.0289               | red            | BP              |
|          | GO:0007218   | neuropeptide signaling pathway              | 4                | 1                  | 0.01            | 0.011                | tan            | BP              |
|          | GO:0007186   | G-protein coupled receptor signaling pat... | 250              | 4                  | 0.69            | 0.024                | tan            | BP              |
|          | GO:0006801   | superoxide metabolic process                | 13               | 1                  | 0.04            | 0.035                | tan            | BP              |

B

|              |                                             |                  |                    |                 |                      |                |                 |
|--------------|---------------------------------------------|------------------|--------------------|-----------------|----------------------|----------------|-----------------|
| GO:0030131   | clathrin adaptor complex                    | 10               | 1                  | 0.02            | 0.02                 | salmon         | CC              |
| GO:0005622   | intracellular                               | 1118             | 12                 | 16.21           | 0.016                | red            | CC              |
| GO:0005581   | collagen trimer                             | 100              | 3                  | 0.13            | 0.00015              | M9             | CC              |
| GO:0004867   | serine-type endopeptidase inhibitor acti... | 21               | 2                  | 0.28            | 0.0319               | red            | MF              |
| GO:0008083   | growth factor activity                      | 17               | 1                  | 0.04            | 0.04                 | tan            | MF              |
| GO:0042302   | structural constituent of cuticle           | 209              | 6                  | 0.67            | 4.50E-05             | M9             | MF              |
| GO:0005201   | extracellular matrix structural constitu... | 100              | 3                  | 0.32            | 0.004                | M9             | MF              |
| GO:0006508   | proteolysis                                 | 929              | 9                  | 3.16            | 0.002                | M9             | BP              |
| <b>GO.ID</b> | <b>Term</b>                                 | <b>Annotated</b> | <b>Significant</b> | <b>Expected</b> | <b>classicFisher</b> | <b>geneset</b> | <b>category</b> |
| GO:0004553   | hydrolase activity, hydrolyzing O-glycos... | 317              | 73                 | 42.77           | 3.60E-06             | blue           | MF              |
| GO:0016705   | oxidoreductase activity, acting on paire... | 143              | 34                 | 19.29           | 0.00016              | blue           | MF              |
| GO:0005506   | iron ion binding                            | 164              | 40                 | 22.13           | 6.00E-04             | blue           | MF              |
| GO:0004252   | serine-type endopeptidase activity          | 518              | 93                 | 69.88           | 0.0019               | blue           | MF              |
| GO:0020037   | heme binding                                | 149              | 33                 | 20.1            | 0.0024               | blue           | MF              |
| GO:0008417   | fucosyltransferase activity                 | 125              | 28                 | 16.86           | 0.00418              | blue           | MF              |
| GO:0015299   | solute:proton antiporter activity           | 10               | 5                  | 1.35            | 0.0062               | blue           | MF              |
| GO:0005201   | extracellular matrix structural constitu... | 100              | 23                 | 13.49           | 0.00639              | blue           | MF              |
| GO:0004672   | protein kinase activity                     | 763              | 123                | 102.94          | 0.00681              | blue           | MF              |
| GO:0051033   | RNA transmembrane transporter activity      | 4                | 3                  | 0.54            | 0.00881              | blue           | MF              |
| GO:0015116   | sulfate transmembrane transporter activi... | 11               | 5                  | 1.48            | 0.01012              | blue           | MF              |
| GO:0016805   | dipeptidase activity                        | 8                | 4                  | 1.08            | 0.0147               | blue           | MF              |
| GO:0008013   | beta-catenin binding                        | 2                | 2                  | 0.27            | 0.01819              | blue           | MF              |
| GO:0008199   | ferric iron binding                         | 9                | 4                  | 1.21            | 0.02367              | blue           | MF              |
| GO:0000062   | fatty-acyl-CoA binding                      | 10               | 4                  | 1.35            | 0.03531              | blue           | MF              |
| GO:0004013   | adenosylhomocysteinase activity             | 3                | 2                  | 0.4             | 0.04966              | blue           | MF              |
| GO:0015930   | glutamate synthase activity                 | 3                | 2                  | 0.4             | 0.04966              | blue           | MF              |
| GO:0004842   | ubiquitin-protein transferase activity      | 34               | 13                 | 4.24            | 0.00027              | brown          | MF              |

|            |                                             |      |     |        |          |       |    |
|------------|---------------------------------------------|------|-----|--------|----------|-------|----|
| GO:0004970 | ionotropic glutamate receptor activity      | 56   | 16  | 6.98   | 0.00098  | brown | MF |
| GO:0005515 | protein binding                             | 2135 | 292 | 266.21 | 0.00539  | brown | MF |
| GO:0004677 | DNA-dependent protein kinase activity       | 2    | 2   | 0.25   | 0.01554  | brown | MF |
| GO:0004402 | histone acetyltransferase activity          | 13   | 5   | 1.62   | 0.01624  | brown | MF |
| GO:0004484 | mRNA guanylyltransferase activity           | 18   | 6   | 2.24   | 0.01825  | brown | MF |
| GO:0005524 | ATP binding                                 | 1009 | 147 | 125.81 | 0.01983  | brown | MF |
| GO:0005328 | neurotransmitter:sodium symporter activi... | 19   | 6   | 2.37   | 0.02393  | brown | MF |
| GO:0009982 | pseudouridine synthase activity             | 37   | 9   | 4.61   | 0.03447  | brown | MF |
| GO:0004517 | nitric-oxide synthase activity              | 3    | 2   | 0.37   | 0.04274  | brown | MF |
| GO:0030151 | molybdenum ion binding                      | 3    | 2   | 0.37   | 0.04274  | brown | MF |
| GO:0005975 | carbohydrate metabolic process              | 385  | 77  | 52.42  | 2.30E-05 | blue  | BP |
| GO:0015074 | DNA integration                             | 56   | 18  | 7.62   | 0.00028  | blue  | BP |
| GO:0006508 | proteolysis                                 | 929  | 145 | 126.48 | 0.00882  | blue  | BP |
| GO:0033227 | dsRNA transport                             | 4    | 3   | 0.54   | 0.00904  | blue  | BP |
| GO:0008272 | sulfate transport                           | 11   | 5   | 1.5    | 0.0105   | blue  | BP |
| GO:0055114 | oxidation-reduction process                 | 427  | 73  | 58.14  | 0.01863  | blue  | BP |
| GO:0006486 | protein glycosylation                       | 192  | 36  | 26.14  | 0.02624  | blue  | BP |
| GO:0006468 | protein phosphorylation                     | 759  | 121 | 103.34 | 0.02786  | blue  | BP |
| GO:0006812 | cation transport                            | 121  | 18  | 16.47  | 0.02918  | blue  | BP |
| GO:0016567 | protein ubiquitination                      | 19   | 8   | 2.36   | 0.00117  | brown | BP |
| GO:0006303 | double-strand break repair via nonhomolo... | 5    | 3   | 0.62   | 0.01571  | brown | BP |
| GO:0006836 | neurotransmitter transport                  | 19   | 6   | 2.36   | 0.02342  | brown | BP |
| GO:0016192 | vesicle-mediated transport                  | 67   | 16  | 8.32   | 0.03683  | brown | BP |
| GO:0006809 | nitric oxide biosynthetic process           | 3    | 2   | 0.37   | 0.04239  | brown | BP |
| GO:0001522 | pseudouridine synthesis                     | 39   | 9   | 4.84   | 0.04564  | brown | BP |
| GO:0016020 | membrane                                    | 1595 | 237 | 192.58 | 9.30E-07 | blue  | CC |
| GO:0005581 | collagen trimer                             | 100  | 23  | 12.07  | 0.0014   | blue  | CC |

|            |                                    |     |     |        |          |       |    |
|------------|------------------------------------|-----|-----|--------|----------|-------|----|
| GO:0016021 | integral component of membrane     | 748 | 111 | 90.32  | 0.0061   | blue  | CC |
| GO:0004252 | serine-type endopeptidase activity | 518 | 101 | 64.59  | 1.80E-06 | brown | MF |
| GO:0004672 | protein kinase activity            | 763 | 121 | 95.14  | 0.00266  | brown | MF |
| GO:0020037 | heme binding                       | 149 | 27  | 18.58  | 0.02823  | brown | MF |
| GO:0005506 | iron ion binding                   | 164 | 28  | 20.45  | 0.04395  | brown | MF |
| GO:0006508 | proteolysis                        | 929 | 148 | 115.35 | 0.00012  | brown | BP |
| GO:0006468 | protein phosphorylation            | 759 | 120 | 94.25  | 0.00239  | brown | BP |
| GO:0015074 | DNA integration                    | 56  | 15  | 6.95   | 0.00267  | brown | BP |

### Interspecies comparison of response to stress exposure

We made use of two data sets to extract orthologs which are involved in *Daphnia* reproduction after stress exposure. One data set derived from our long-term exposure to fish kairomones in *D. galeata* (specifically 'blue' and 'brown' module). The other data set resulted from another study, based on the long-term exposure of *D. pulex* to combinations of cyanobacteria and insecticides (Asselman *et al.*, 2018).

Orthology analysis resulted in 42 orthologous clusters containing a least one sequence from each set, comprising 839 sequences (Figure 5B). Two-thirds of the orthologous clusters also comprised *Drosophila* and *Nasonia* transcripts, while one third was *Daphnia* specific (Table S6B). 300 orthologs were found for *D. pulex*, of which 50 transcripts belong to the data set of Asselman *et al.* (2018). Altogether, 221 orthologs were found for *D. galeata* of which 140 had a GO term annotation. The annotated orthologs were found in 28 orthologous clusters and their unique GO terms (n=48) were extracted (Table S7).

### **Discussion**

From an ecological point of view, predator-induced responses in *Daphnia* have been studied extensively. In the past years, few studies have addressed the link between such ecological traits and their underlying genetic pathways (Rozenberg *et al.*, 2015; Hales *et al.*, 2017; Orsini *et al.*, 2018). Similar trends in life history shifts after exposure to predator kairomones have been observed across *Daphnia* species showing e.g. the predominant trend of early maturation and a decreased body size under

vertebrate predation risk (e.g., Riessen, 1999). Thereupon, it seems reasonable to formulate the hypothesis that similar transcripts, differentially expressed, could be involved in the predator-induced response. To gain insights into the genetic basis of predator-induced responses, we performed gene expression profiling on two *D. galeata* clonal lines after long-term exposure to fish kairomones. We identified a number of transcripts correlated with shifts in life history and used gene co-expression network analysis and Gene Ontology (GO) annotation to describe the potential functions of previously unknown biological pathways. The orthology approach provided insights into the evolutionary background of transcripts, indicating that the majority of orthologs were *Daphnia*-specific under predation risk, while the majority of orthologs to transcripts involved in *Daphnia* reproduction were conserved throughout arthropods.

### Insights from differential gene expression analysis – same transcripts, differentially expressed?

In contrast to our expectations, the differential gene expression analysis revealed only a moderate number of differentially expressed transcripts between environments (control vs. fish) within each clonal line. We expected more pronounced changes in gene expression because the chosen *D. galeata* clonal lines displayed strong shifts in life history traits after three generations of fish kairomone exposure (Tams *et al.*, 2018). In comparison, transgenerational plasticity was described for *D. ambigua* (Hales *et al.*, 2017) where 48 genes were significantly differentially expressed after one generation of fish kairomone exposure and respectively, 223 and 170 genes in the second and third generation without any

predator kairomones. To date, it is unknown whether *D. galeata* clonal lines display transgenerational plasticity and pass on epigenetic modifications after exposure to fish kairomones. Further investigations are therefore required to understand the epigenetic level of inheritance in *Daphnia*. However, the effect of kairomone exposure is expected to be cumulative and to increase over the course of multiple generations, e.g. *D. pulex* displays the largest helmets when exposed to kairomones from *Leptodora kindtii* (an invertebrate predator) for two generations compared to the first generation (Agrawal *et al.*, 1999). For these reasons, we expected the shifts in gene expression to be cumulative and substantial changes to occur in the third experimental generation.

A possible explanation for the weak changes in gene expression is that the response to kairomones is not only caused by changes in gene expression but additional posttranslational processes, such as miRNA-mediated regulation or increased degradation (Schwarzenberger, Courts, & Von Elert, 2009). Another possibility is that life history changes are only marginally correlated with gene expression. The *D. galeata* clonal lines used here only displayed shifts in life history, whereas other *Daphnia* species show additional adaptations of morphology and behavior that could be caused by or correlated to much stronger differential gene expression, e.g. neck-teeth induction that was linked to 230 differentially expressed genes in *D. pulex* (Rozenberg *et al.*, 2015).

The gene expression analysis of the reanalyzed *D. magna* data set revealed no significantly differentially expressed transcripts. This weak response could be due to the short exposure time to fish

kairomones, a biotic factor. Orsini *et al.* (2016) focused on characterizing the early transcriptional stress response to a total of 12 stressors, and found that the abiotic stressors caused stronger responses after a 24 h exposure than the biotic factor (Orsini *et al.*, 2018). It remains unclear whether and how the early stress response deviates from the long-time exposure.

The differential gene expression analysis of our study identified a large divergence between clonal lines of the same population in *D. galeata* (5,283 DETs). This divergence seem to be large and surprising since the reanalysis of the *D. magna* RNA-seq data of Orsini *et al.* (2016) revealed 2,929 DETs between the two clonal lines from Southern Germany and Southwest Finland (~2,000 km apart) and different habitats (temporary rock pool system connected to the Baltic Sea and a fish-rearing pond). Hence, in this case *D. galeata* from the same population/lake differ more in their gene expression than clonal lines of *D. magna* from different populations and habitats. Our results confirm that geographical distance is not necessarily correlated with intraspecific divergence in gene expression profiles in *Daphnia*, concurring with previous studies in our group (Ravindran *et al.*, 2019).

We expected to find similar transcripts to be involved in the contrasting life history responses of the two clonal lines. Hypothetically spoken, we expected transcript X to be up-regulated (or vice versa) when the life history response shifted to early maturation and a reduced body size and that the transcript X would be down-regulated (or vice versa) when the life history response shifted to late maturation and increased body size. In contrast, a completely different set of



transcripts seems to be linked to kairomone response within each clonal line. It is possible that any effect of fish kairomone exposure was obscured by the antithetical reproduction strategies in the divergent set of transcripts. Fewer DETs were found in clonal line M6, and most were down-regulated. The life history response of M6 with decreasing body size to reduce the probability to be detected by vertebrate predators, seems to be the predominant strategy recorded in previous studies (e.g., Riessen, 1999). In contrast, about three times more DETs were found for clonal line M9 which were either up- or down-regulated. To clarify whether DETs are actually clone-specific it would be necessary to generate RNA-seq data for more *D. galeata* clonal lines from the same and other populations, both with shared and divergent life histories. Our results leave room to speculate that no single predator-response mechanism in *Daphnia* exist, instead it seems more likely that several strategies developed over time. This speculation seems likely since *Daphnia* have the ability to rapidly adapt to local predator regimes (Declerck & Meester, 2003).

The gene co-expression network analysis reflects clone-specific gene expression as well. The majority of the transcripts correlated to clonal lines in *D. galeata* were assigned to either the 'brown' or 'blue' module. Since the clonal lines were chosen due to their antithetical life history response it seems reasonable to suggest that the categorical factor 'clonal line' and 'reproduction strategy' are tightly linked. The gene co-expression network constructed for *D. magna* seems to be mainly driven by large clone-specific modules with very little effect of fish kairomone exposure, too. This is not surprising as the differential expression

analysis for *D. magna* did not reveal differentially expressed transcripts for fish exposed individuals. Given that life history traits were not recorded for the *D. magna* clonal lines, we cannot infer whether the *D. magna* gene co-expression network correlates with life history traits or reproduction strategies.

#### Insights from gene set enrichment analysis (GSEA) – different transcripts, similar functions

In brief, our gene ontology analysis revealed digestion- and growth-related enriched GO terms. These are interesting because previous studies showed that predator-induced responses in *Daphnia* include changes in body size (e.g., Tams *et al.*, 2018), morphological modifications (e.g., Laforsch & Tollrian, 2004) and the importance of peptidases for juvenile growth rate (Schwarzenberger, Kuster, & Von Elert, 2012).

The 'salmon' gene co-expression module in *D. galeata* showed enrichment for terms summarized as 'serine-type endopeptidase activity', which is found in the gut of *D. magna* as the most important digestive protease (Agrawal *et al.*, 2005). In *D. ambigua*, which is a species from the *D. pulex*-complex and more closely related to *D. galeata* than *D. magna* (Petrušek, Bastiansen, & Schwenk, 2005), the exposure to predator kairomones for one generation also lead to an up-regulation of genes related to digestive functions (Hales *et al.*, 2017). Cyanobacterial protease inhibitors cause considerable damage to *Daphnia* populations by inhibiting the gut proteases and impairing digestion (Schwarzenberger *et al.*, 2010). These studies concord with our results and suggests that an increase in serine-type endopeptidase activity leads to improved

digestion and feeding efficiency that is necessary for the resource allocation that comes with shifts in life history, such as producing a greater number of offspring.

The GO term 'structural constituent of cuticle' was identified as biologically relevant in both clonal lines, M6 and M9, suggesting that even if there was no overlap in the affected transcripts, similar functions were affected. The structural constituent of cuticle was also found to be enriched in *D. pulex* exposed to *Chaoborus* kairomones (Rozenberg *et al.*, 2015) and is related to remodeling of the cuticle. Furthermore, it was also enriched in the proteomic response of *D. magna* to *Triops cancriformis* (Otte *et al.*, 2015) and is thought to be related to changes in carapace morphology as well as the formation of ultrastructural defenses of the cuticle (Rabus *et al.*, 2013).

A gene co-expression network analysis also revealed that *D. magna* exposed to vertebrate and invertebrate predator kairomones are enriched for genes related to body remodeling and activation of cuticle proteins (Orsini *et al.*, 2018). No pronounced morphological defenses have been described for the investigated *D. galeata* clonal lines, but they displayed changes in body size and symmetry especially with regard to head shape (Tams *et al.*, 2018). Furthermore, for *D. magna*, *D. pulex* and *D. cucullata*, not only visible morphology changes but also fortification of the carapace in the presence of predator kairomones has been recorded (Laforsch & Tollrian, 2004; Rabus *et al.*, 2013). Our results indicated that ultrastructural defenses could also be present in *D. galeata*.

Altogether, cuticle-associated proteins seem to play an essential role in the response to vertebrate or invertebrate

predators. DETs found in clonal line M6 showed the possible involvement of 'metallocarboxypeptidase activity', which is also known to be involved in the stress response to copper in *D. pulex* (Chain *et al.*, 2019). Interestingly, 'chitin metabolic process', 'proteolysis', 'structural constituent of cuticle', 'chitin binding', 'serine-type endopeptidase' and 'metallopeptidase activity' were all found to be enriched in a gene expression analysis during the molt cycle in the marine copepod *Calanus finmarchicus* (Tarrant *et al.*, 2014). Since *Daphnia* need to shed their rigid carapace in order to grow, molting is directly related to changes in body size. Another analysis of *D. magna* exposed to *Triops cancriformis* kairomones revealed the role of proteins related to the cuticle, muscular system, energy metabolism and regulatory proteins that may be involved in morphological carapace defenses and changes in resource allocation (Otte *et al.*, 2014). In conclusion, a number of pathways that were hypothesized to be involved in kairomone response could be confirmed, such as transcripts related to body remodeling and growth.

It is worthwhile to mention that some biologically interesting gene functions were only found with the help of the gene co-expression network analysis and would have been overlooked with only a differential expression analysis. For example, the GO term 'growth factor activity' occurred in both 'red' and 'tan' modules, which correlated negatively with fish kairomone exposure and comprising transcripts not identified as DETs. Nevertheless, they could be extremely important for life history changes and might be directly related to changes in somatic growth rate and body length.

There were no hints found for the involvement of yolk protein genes or perception related genes. Only a small amount of expected GO terms were found in this analysis which could be explained by the small number of annotated transcripts (~34%). For a more comprehensive understanding of genetic links to phenotypic variation and their involved pathways, further annotations and therefore functional tests of candidate genes are needed. When GO annotations progress, a re-analysis might provide new elements for understanding the genetic basis of predator-induced responses in phenotypes.

#### Insights from orthology analysis – homologous sequences, common ancestor and similar functions?

The focus on orthologs, homologous sequences that differ because of speciation events, is the most popular strategy to derive functional similarity of sequences (Pearson, 2013). The results of this long-term exposure experiment to fish kairomones (14 days) in *D. galeata* was put into the context of two recent transcriptomic studies in *Daphnia*. First, we compared the results to the reanalyzed data set of Orsini *et al.* (2016) who investigated the short-term exposure (4 hours) to fish kairomones in *D. magna* to identify common transcripts involved in predator-induced responses. Despite differences in research goals, we expected to find common transcripts involved in predator-induced responses because similar predator-induced responses have been observed in several studies across *Daphnia* species. Two-thirds of the discovered orthologs between *D. magna* and *D. galeata* seem to be *Daphnia* specific (Table S6A), suggesting that similar transcripts could be involved in the

predator-induced responses in both species.

The second interspecies comparison compared candidate transcripts of *D. galeata* to *D. pulex* transcripts predicted to be involved in reproduction (Asselman *et al.*, 2018) to shed light on reproduction strategies of *Daphnia* after the exposure to stressors. We identified 29 orthologous groups containing both at least one *D. galeata* transcript with a GO term (Huylmans *et al.*, 2016) and one predicted *D. pulex* transcript. These transcripts (orthologs) seem to be highly conserved within arthropods (Table S6B). Their GO terms were extracted, yielding 48 unique interspecies reproduction-related GO terms. Their functions can be summarized into enzymatic activities, metabolic processes, transport and binding. Five expected GO terms (Table S2) were found within the list of interspecies reproduction-related GO terms (Table S7): ‘DNA binding’, ‘carbohydrate metabolic process’, ‘signal transduction’, ‘zinc ion binding’ and ‘integral component of membrane’. Little to no information was found as to how these GO terms are involved in *Daphnia* reproduction, physiology or stress responses. An up-regulated transcript linked to ‘DNA binding’ was found in a gene expression study with *D. magna* which reduced their reproductive output when exposed to Bisphenol-A (Jeong *et al.*, 2013). Hence, our results are a starting point for further investigations to understand the molecular mechanisms of reproduction in *Daphnia*.

In summary, the aim of this study was to characterize the genetic basis for the predator-induced response of the freshwater grazer *D. galeata*. Our hypothesis that a common predator-induced response at gene expression level

with shared transcripts exists within *D. galeata* could not be confirmed, instead different transcripts with similar functions were identified. Thus, the transcriptional profiling revealed differentially expressed transcripts and gene co-expression modules in connection to predator induced responses and reproduction in *Daphnia*. The pathways discovered here represent a valuable starting point for future investigations addressing the functionality of certain transcripts per se or in respect to a stress response. For example, by providing detailed lists of candidate transcripts one can choose specific candidates to test their biological functions in knock-down experiments. Furthermore, the hypothesis that a common predator-induced response at gene expression level exists among *Daphnia* species could be confirmed through the comparative transcriptomics approach. The interspecies comparison revealed *Daphnia* specific transcripts involved in predator-induced responses and conserved transcripts involved in *Daphnia* reproduction.

#### Authors' contributions

The study was designed by VT, JHN and MC; laboratory work was carried out by JHN, AE and VT; gene expression and gene network analysis was done by JHN and VT; VT, JHN and MC wrote the manuscript, all authors gave final approval.

#### Acknowledgments

We thank Jonny Schulze for his help during *Daphnia* breeding and the experiment. This work was supported by the Volkswagen Foundation (Grant No. 86030). Animal handling and experiments were in accordance with the ethical standards (approved for the execution of experiments on vertebrates, No. 75/15).

We thank Jana Asselman for sharing gene information according to reproduction-related genes in *Daphnia pulex*. We thank Suda Parimala Ravindran for her advice and sharing the annotation information of the *Daphnia galeata* transcriptome. Lastly, we would like to thank Jennifer Lohr for her language check and very useful editing, as well as two anonymous reviewers for comments on an earlier version of this manuscript.

#### Data Accessibility

Raw RNA-seq reads for all 12 samples and the experimental set up for the analysis of DETs are available from ArrayExpress (accession E-MTAB-6234). Raw reads counts, custom scripts and supplementary tables will be made available on Dryad upon publication.

#### References

- Agrawal MK, Zitt A, Bagchi D, Weckesser J, Bagchi SN & Von Elert E. 2005.** Characterization of proteases in guts of *Daphnia magna* and their inhibition by *Microcystis aeruginosa* PCC 7806. *Environmental Toxicology* **20**: 314–322.
- Agrawal AA, Laforsch C & Tollrian R. 1999.** Transgenerational induction of defences in animals and plants. *Nature* **401**: 60–63.
- Aldana M, Maturana D, Pulgar J & García-Huidobro MR. 2016.** Predation and anthropogenic impact on community structure of boulder beaches. *Scientia Marina* **80**: 543–551.
- Alexa A & Rahnenführer J. 2016.** topGO: Enrichment Analysis for Gene Ontology. R package version 2.30.0.
- Altshuler I, McLeod AM, Colbourne JK, Yan ND & Cristescu ME. 2015.** Synergistic interactions of biotic and abiotic

environmental stressors on gene expression. *Genome* **58**: 99–109.

**Anders S, Pyl PT & Huber W. 2015.** HTSeq—a Python framework to work with high-throughput sequencing data. *Bioinformatics* **31**: 166–169.

**Andrews S. 2010.** FastQC: A quality control tool for high throughput sequence data. Available from: <http://www.bioinformatics.babraham.ac.uk/projects/fastqc>.

**Asselman J, Pfrender ME, Lopez JA, Shaw JR & Schampelaere KAC. 2018.** Gene Coexpression Networks Drive and Predict Reproductive Effects in *Daphnia* in Response to Environmental Disturbances. *Environmental Science & Technology* **52**: 317–326.

**Bardou P, Mariette J, Escudié F, Djemiel C & Klopp C. 2014.** jvenn: an interactive Venn diagram viewer. *BMC Bioinformatics* **15**: 293.

**Benjamini Y & Hochberg Y. 1995.** Controlling the False Discovery Rate: A Practical and Powerful Approach to Multiple Testing. *Journal of the Royal Statistical Society. Series B (Methodological)* **57**: 289–300.

**Bergmann S, Ihmels J & Barkai N. 2004.** Similarities and Differences in Genome-Wide Expression Data of Six Organisms. *PLoS Biology* **2**: e9.

**Boaden AE & Kingsford MJ. 2015.** Predators drive community structure in coral reef fish assemblages. *Ecosphere* **6**: art46.

**Boeing WJ, Ramcharan CW & Riessen HP. 2006.** Multiple predator defence strategies in *Daphnia pulex* and their

relation to native habitat. *Journal of Plankton Research* **28**: 571–584.

**Boersma M, Spaak P & De Meester L. 1998.** Predator-Mediated Plasticity in Morphology, Life History, and Behavior of *Daphnia*: The Uncoupling of Responses. *The American Naturalist* **152**: 237–248.

**Bolger AM, Lohse M & Usadel B. 2014.** Trimmomatic: a flexible trimmer for Illumina sequence data. *Bioinformatics* **30**: 2114–2120.

**Brett MT. 1992.** *Chaoborus* and fish-mediated influences on *Daphnia longispina* population structure, dynamics and life history strategies. *Oecologia* **89**: 69–77.

**Carbon S, Ireland A, Mungall CJ, Shu S, Marshall B & Lewis S. 2009.** AmiGO: online access to ontology and annotation data. *Bioinformatics* **25**: 288–289.

**Chain FJJ, Finlayson S, Crease T & Cristescu M. 2019.** Variation in transcriptional responses to copper exposure across *Daphnia pulex* lineages. *Aquatic Toxicology* **210**: 85–97.

**Cornetti L, Fields PD, Van Damme K & Ebert D. 2019.** A fossil-calibrated phylogenomic analysis of *Daphnia* and the Daphniidae. *Molecular Phylogenetics and Evolution* **137**: 250–262.

**Cousyn C, Meester LD, Colbourne JK, Brendonck L, Verschuren D & Volckaert F. 2001.** Rapid, local adaptation of zooplankton behavior to changes in predation pressure in the absence of neutral genetic changes. *Proceedings of the National Academy of Sciences* **98**: 6256–6260.

- Declerck S & Meester LD. 2003.** Impact of fish predation on coexisting *Daphnia* taxa: a partial test of the temporal hybrid superiority hypothesis. *Hydrobiologia* **500**: 83–94.
- Desmarais KH. 1997.** Keeping *Daphnia* out of the surface film with cetyl alcohol. *Journal of Plankton Research* **19**: 149–154.
- Effertz C & Von Elert E. 2017.** Coupling of anti-predator defences in *Daphnia*: the importance of light. *Hydrobiologia* **798**: 5–13.
- Estes JA, Terborgh J, Brashares JS, Power ME, Berger J, Bond WJ, Carpenter SR, Essington TE, Holt RD, Jackson JBC, Marquis RJ, Oksanen L, Oksanen T, Paine RT, Pikitch EK, Ripple WJ, Sandin SA, Scheffer M, Schoener TW, Shurin JB, Sinclair ARE, Soulé ME, Virtanen R & Wardle DA. 2011.** Trophic Downgrading of Planet Earth. *Science* **333**: 301–306.
- Fine PVA. 2015.** Ecological and Evolutionary Drivers of Geographic Variation in Species Diversity. *Annual Review of Ecology, Evolution, and Systematics* **46**: 369–392.
- de la Fuente A. 2010.** From ‘differential expression’ to ‘differential networking’ - identification of dysfunctional regulatory networks in diseases. *Trends in genetics* **26**: 326–333.
- Gentleman RC, Carey VJ, Bates DM, Bolstad B, Dettling M, Dudoit S, Ellis B, Gautier L, Ge Y, Gentry J, Hornik K, Hothorn T, Huber W, Iacus S, Irizarry R, Leisch F, Li C, Maechler M, Rossini AJ, Sawitzki G, Smith C, Smyth G, Tierney L, Yang JY & Zhang J. 2004.** Bioconductor: open software development for computational biology and bioinformatics. *Genome Biology* **5**: R80.
- Ghazalpour A, Doss S, Zhang B, Wang S, Plaisier C, Castellanos R, Brozell A, Schadt EE, Drake TA, Lusis AJ & Horvath S. 2006.** Integrating Genetic and Network Analysis to Characterize Genes Related to Mouse Weight. *PLoS Genetics* **2**: e130.
- Hahn MA, Effertz C, Bigler L & Von Elert E. 2019.** 5 $\alpha$ -cyprinol sulfate, a bile salt from fish, induces diel vertical migration in *Daphnia*. *eLife* **8**: e44791.
- Hales NR, Schield DR, Andrew AL, Card DC, Walsh MR & Castoe TA. 2017.** Contrasting gene expression programs correspond with predator-induced phenotypic plasticity within and across generations in *Daphnia*. *Molecular Ecology* **26**: 5003–5015.
- Herrmann M, Ravindran SP, Schwenk K & Cordellier M. 2017.** Population transcriptomics in *Daphnia*: The role of thermal selection. *Molecular Ecology*: 1–16.
- Herzog Q, Rabus M, Wolfschoon Ribeiro B & Laforsch C. 2016.** Inducible Defenses with a ‘Twist’: *Daphnia barbata* Abandons Bilateral Symmetry in Response to an Ancient Predator. *PLOS ONE* **11**: e0148556.
- Huylmans AK, López Ezquerro A, Parsch J & Cordellier M. 2016.** De Novo Transcriptome Assembly and Sex-Biased Gene Expression in the Cyclical Parthenogenetic *Daphnia galeata*. *Genome Biology and Evolution* **8**: 3120–3139.
- Jeong SW, Lee SM, Yum SS, Iguchi T & Seo YR. 2013.** Genomic expression responses toward bisphenol-A toxicity in *Daphnia*

*magna* in terms of reproductive activity. *Molecular & Cellular Toxicology* **9**: 149–158.

**Klüttgen B, Dülmer U, Engels M & Ratte HT. 1994.** ADaM, an artificial freshwater for the culture of zooplankton. *Water Research* **28**: 743–746.

**Kuchta SR & Svensson EI. 2014.** Predator-mediated natural selection on the wings of the damselfly *Calopteryx splendens*: differences in selection among trait types. *The American Naturalist* **184**: 91–109.

**Laforsch C & Tollrian R. 2004.** Inducible Defenses in Multipredator Environments: Cyclomorphosis in *Daphnia cucullata*. *Ecology* **85**: 2302–2311.

**Lampert W. 2011.** *Daphnia: development of a model organism in ecology and evolution*. Oldendorf/Luhe, Germany: International Ecology Institute.

**Langfelder P & Horvath S. 2008.** WGCNA: an R package for weighted correlation network analysis. *BMC Bioinformatics* **9**: 559.

**Li L, Stoeckert CJ & Roos DS. 2003.** OrthoMCL: Identification of Ortholog Groups for Eukaryotic Genomes. *Genome Research* **13**: 2178–2189.

**Love MI, Huber W & Anders S. 2014.** Moderated estimation of fold change and dispersion for RNA-seq data with DESeq2. *Genome Biology* **15**: 550.

**Macháček J. 1991.** Indirect effect of planktivorous fish on the growth and reproduction of *Daphnia galeata*. *Hydrobiologia* **225**: 193–197.

**Morgans CL & Ord TJ. 2013.** Natural selection in novel environments:

predation selects for background matching in the body colour of a land fish. *Animal Behaviour* **86**: 1241–1249.

**Okonechnikov K, Conesa A & García-Alcalde F. 2016.** Qualimap 2: advanced multi-sample quality control for high-throughput sequencing data. *Bioinformatics* **32**: 292–294.

**Orsini L, Gilbert D, Podicheti R, Jansen M, Brown JB, Solari OS, Spanier KI, Colbourne JK, Rush D, Decaestecker E, Asselman J, De Schamphelaere KAC, Ebert D, Haag CR, Kvist J, Laforsch C, Petrusek A, Beckerman AP, Little TJ, Chaturvedi A, Pfrender ME, De Meester L & Frilander MJ. 2016.** *Daphnia magna* transcriptome by RNA-Seq across 12 environmental stressors. *Scientific Data* **3**: 160030.

**Orsini L, Brown JB, Shams Solari O, Li D, He S, Podicheti R, Stoiber MH, Spanier KI, Gilbert D, Jansen M, Rusch DB, Pfrender ME, Colbourne JK, Frilander MJ, Kvist J, Decaestecker E, De Schamphelaere KAC & De Meester L. 2018.** Early transcriptional response pathways in *Daphnia magna* are coordinated in networks of crustacean-specific genes. *Molecular Ecology* **27**: 886–897.

**Otte KA, Fröhlich T, Arnold GJ & Laforsch C. 2014.** Proteomic analysis of *Daphnia magna* hints at molecular pathways involved in defensive plastic responses. *BMC Genomics* **15**: 306.

**Otte KA, Schrank I, Fröhlich T, Arnold GJ & Laforsch C. 2015.** Interclonal proteomic responses to predator exposure in *Daphnia magna* may depend on predator composition of habitats. *Molecular Ecology* **24**: 3901–3917.

- Pearson WR. 2013.** An introduction to sequence similarity ('homology') searching. *Current Protocols in Bioinformatics* **Chapter 3**: Unit3.1.
- Petrusek A, Bastiansen F & Schwenk K. 2005.** European *Daphnia* Species (EDS) - Taxonomic and genetic keys. [Build 2006-01-12 beta]. CD-ROM, distributed by the authors. Department of Ecology and Evolution, J.W. Goethe-University, Frankfurt am Main, Germany & Department of Ecology, Charles University, Prague, Czechia.
- R Core Team. 2017.** R: A language and environment for statistical computing. Vienna, Austria: R Foundation for Statistical Computing. URL <https://www.R-project.org/>.
- Rabus M, Söllradl T, Clausen-Schaumann H & Laforsch C. 2013.** Uncovering Ultrastructural Defences in *Daphnia magna* – An Interdisciplinary Approach to Assess the Predator-Induced Fortification of the Carapace. *PLOS ONE* **8**: e67856.
- Ravindran SP, Herrmann M & Cordellier M. 2019.** Contrasting patterns of divergence at the regulatory and sequence level in European *Daphnia galeata* natural populations. *Ecology and Evolution* **9**: 2487–2504.
- Riessen HP. 1999.** Predator-induced life history shifts in *Daphnia*: a synthesis of studies using meta-analysis. *Canadian Journal of Fisheries and Aquatic Sciences* **56**: 2487–2494.
- Rozenberg A, Parida M, Leese F, Weiss LC, Tollrian R & Manak JR. 2015.** Transcriptional profiling of predator-induced phenotypic plasticity in *Daphnia pulex*. *Frontiers in Zoology* **12**: 18.
- Schoeppner NM & Relyea RA. 2009.** Interpreting the smells of predation: how alarm cues and kairomones induce different prey defences. *Functional Ecology* **23**: 1114–1121.
- Schwarzenberger A, Zitt A, Kroth P, Mueller S & Von Elert E. 2010.** Gene expression and activity of digestive proteases in *Daphnia*: effects of cyanobacterial protease inhibitors. *BMC Physiology* **10**: 6.
- Schwarzenberger A, Courts C & Von Elert E. 2009.** Target gene approaches: Gene expression in *Daphnia magna* exposed to predator-borne kairomones or to microcystin-producing and microcystin-free *Microcystis aeruginosa*. *BMC Genomics* **10**: 527.
- Schwarzenberger A, Kuster CJ & Von Elert E. 2012.** Molecular mechanisms of tolerance to cyanobacterial protease inhibitors revealed by clonal differences in *Daphnia magna*. *Molecular Ecology* **21**: 4898–4911.
- Sedlazeck FJ, Rescheneder P & Von Haeseler A. 2013.** NextGenMap: fast and accurate read mapping in highly polymorphic genomes. *Bioinformatics* **29**: 2790–2791.
- Serin EAR, Nijveen H, Hilhorst HWM & Ligterink W. 2016.** Learning from Co-expression Networks: Possibilities and Challenges. *Frontiers in Plant Science* **7**: 444.
- Spaak P & Boersma M. 2001.** The influence of fish kairomones on the induction and vertical distribution of sexual individuals of the *Daphnia galeata* species complex. *Hydrobiologia* **442**: 185–193.



- Stibor H. 1992.** Predator induced life-history shifts in a freshwater cladoceran. *Oecologia* **92**: 162–165.
- Stibor H & Lüning J. 1994.** Predator-Induced Phenotypic Variation in the Pattern of Growth and Reproduction in *Daphnia hyalina* (Crustacea: Cladocera). *Functional Ecology* **8**: 97–101.
- Stich HB & Lampert W. 1981.** Predator evasion as an explanation of diurnal vertical migration by zooplankton. *Nature* **293**: 396–398.
- Subramanian A, Tamayo P, Mootha VK, Mukherjee S, Ebert BL, Gillette MA, Paulovich A, Pomeroy SL, Golub TR, Lander ES & Mesirov JP. 2005.** Gene set enrichment analysis: A knowledge-based approach for interpreting genome-wide expression profiles. *Proceedings of the National Academy of Sciences* **102**: 15545–15550.
- Tams V, Lüneburg J, Seddar L, Detampel JP & Cordellier M. 2018.** Intraspecific phenotypic variation in life history traits of *Daphnia galeata* populations in response to fish kairomones. *PeerJ* **6**: e5746.
- Tarrant AM, Baumgartner MF, Hansen BH, Altin D, Nordtug T & Olsen AJ. 2014.** Transcriptional profiling of reproductive development, lipid storage and molting throughout the last juvenile stage of the marine copepod *Calanus finmarchicus*. *Frontiers in Zoology* **11**: 91.
- Timmermans MJTN, Roelofs D, Nota B, Ylstra B & Holmstrup M. 2009.** Sugar sweet springtails: on the transcriptional response of *Folsomia candida* (Collembola) to desiccation stress. *Insect Molecular Biology* **18**: 737–746.
- Tollrian R. 1995.** Predator-Induced Morphological Defenses: Costs, Life History Shifts, and Maternal Effects in *Daphnia Pulex*. *Ecology* **76**: 1691–1705.
- Van Straalen NM. 2003.** Ecotoxicology Becomes Stress Ecology. *Environmental Science & Technology* **37**: 324A–330A.
- Weider LJ & Pijanowska J. 1993.** Plasticity of *Daphnia* Life Histories in Response to Chemical Cues from Predators. *Oikos* **67**: 385–392.
- Wickham H. 2009.** *ggplot2: Elegant Graphics for Data Analysis*. New York, NY: Springer-Verlag.
- Wolinska J, Löffler A & Spaak P. 2007.** Taxon-specific reaction norms to predator cues in a hybrid *Daphnia* complex. *Freshwater Biology* **52**: 1198–1209.
- Yin M, Laforsch C, Lohr JN & Wolinska J. 2011.** Predator-induced defense makes *Daphnia* more vulnerable to parasites. *Evolution; International Journal of Organic Evolution* **65**: 1482–1488.
- Zhao X, Yu H, Kong L & Li Q. 2016.** Gene Co-Expression Network Analysis Reveals the Correlation Patterns Among Genes in Euryhaline Adaptation of *Crassostrea gigas*. *Marine Biotechnology* **18**: 535–544.
